# Supplementary material
Source: PubMed Central journal article supplement (PMC5136305)
Supplement: NIHMS823629-supplement-1.pdf [file NIHMS823629-supplement-1.pdf]

Supplemental Table I. Necropsied SIV-infected rhesus macaques

| <b>Macaque</b> | <b>Tissue collected</b> | <b>Sex</b> | <b>Immunization history prior to infection</b> | <b>Viral load</b> | <b>Weeks post-infection</b> |
|----------------|-------------------------|------------|------------------------------------------------|-------------------|-----------------------------|
| P180           | Blood                   | F          | Ad-SIV/Env in MF59 <sup>a</sup>                | 50                | 23                          |
| R651           | Blood                   | F          | Ad-SIV/Env in MF59                             | 1563628           | 39                          |
| G433           | Blood                   | F          | Ad-SIV/Env in MPL-SE <sup>b</sup>              | 12620             | 68-76                       |
| G434           | Blood                   | F          | Ad-SIV/Env in MPL-SE                           | 10865797          | 68-76                       |
| G418           | Blood                   | M          | Ad-SIV/Env in MPL-SE                           | 594               | 68-76                       |
| G414           | Blood                   | M          | Ad-SIV/Env in MPL-SE                           | 6949              | 68-76                       |
| G408           | Blood                   | M          | Ad-SIV/Env in MPL-SE                           | 12803             | 68-76                       |
| G407           | Blood                   | M          | Ad-SIV/Env in MPL-SE                           | 103520            | 68-76                       |
| R249           | Blood                   | M          | Ad-SIV/Env in MF59                             | 50                | 31                          |
| R254           | Blood                   | M          | Ad-SIV/ALVAC-SIV/gp120 in alum <sup>c</sup>    | 1685512           | 14                          |
| R277           | Blood                   | M          | SIV gp120 in MF59 <sup>c</sup>                 | 1927722           | 14                          |
| G423           | Blood                   | M          | naïve <sup>b</sup>                             | 50                | 68-76                       |
| M903           | Blood                   | M          | alum only <sup>d</sup>                         | 193383            | 27                          |
| R407           | Blood                   | M          | Ad vector + MF59 <sup>a</sup>                  | 7192380           | 39                          |
| P180           | FRT / rectal            | F          | Ad-SIV/Env in MF59                             | 50                | 44                          |
| R652           | FRT / rectal            | F          | Ad-SIV/Env in MF59                             | 72485             | 40                          |
| R248           | FRT / rectal            | F          | Ad-SIV/Env in MF59                             | 1208963           | 48                          |
| R651           | FRT / rectal            | F          | Ad-SIV/Env in MF59                             | 2478356           | 52                          |
| R663           | FRT / rectal            | F          | Ad-SIV/Env in MF59                             | 50                | 48                          |
| R647           | FRT / rectal            | F          | Ad-SIV/Env in MF59                             | 156               | 48                          |
| R280           | FRT / rectal            | F          | Ad-SIV/Env in MF59                             | 482               | 44                          |
| R666           | FRT / rectal            | F          | Ad-SIV/Env in MF59                             | 14246             | 45                          |
| R650           | FRT / rectal            | F          | Ad-SIV/Env in MF59                             | 15244             | 50                          |
| R660           | FRT / rectal            | F          | Ad vector + MF59                               | 21099             | 50                          |
| R645           | rectal                  | M          | Ad-SIV/Env in MF59                             | 50                | 52                          |
| P602           | rectal                  | M          | Ad-SIV/Env in MF59                             | 18429             | 51                          |
| R659           | rectal                  | M          | Ad-SIV/Env in MF59                             | 443914            | 50                          |
| R249           | rectal                  | M          | Ad-SIV/Env in MF59                             | 6178              | 51                          |
| R657           | rectal                  | M          | Ad-SIV/Env in MF59                             | 190803            | 49                          |
| R407           | rectal                  | M          | Ad vector + MF59                               | 7298622           | 52                          |

<sup>a</sup>Tuero et al. (37)<sup>b</sup>Xiao et al. (38)<sup>c</sup>Franchini et al., in preparation<sup>d</sup>Pegu et al. (39)

## Rectum

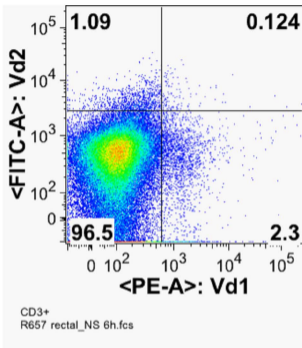

## Vagina

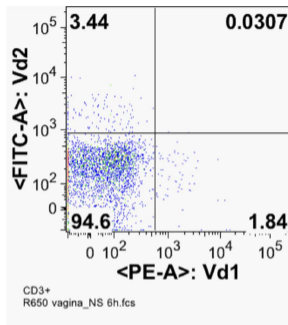

## Ectocervix

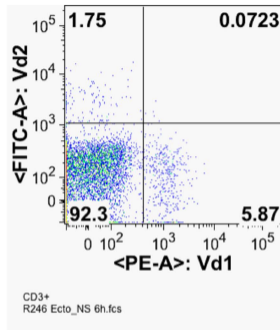

## Endocervix

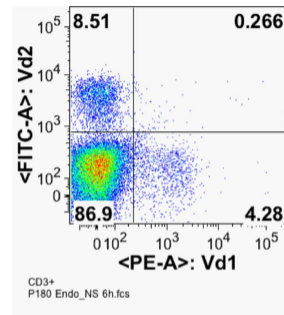

**Supplemental Figure 1.** Representative flow cytometry gating strategy for  $V\delta 1$  and  $V\delta 2$  T cells in mucosal tissue: Rectum, vagina, ectocervix and endocervix. In the singlet, live lymphocytes gate  $CD3^+$  T cells were interrogated for the expression of  $V\delta 1$  or  $V\delta 2$  TCR.

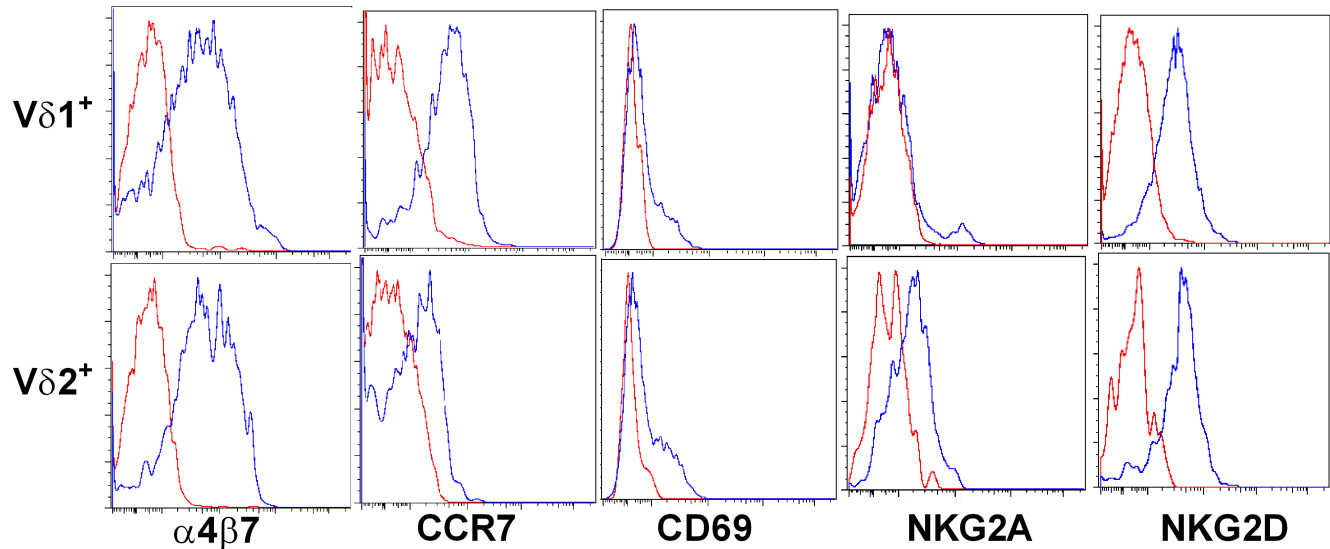

**Supplemental Figure 2.** Expression of homing receptor and activation markers in T cells. Representative histograms showing the expression of  $\alpha$ 4 $\beta$ 7, CCR7, CD69, NKG2A and NKG2D in V $\delta$ 1 and V $\delta$ 2 T cells. Fluorochrome -matched isotype controls are represented by red histograms.
